# Supplementary material for: Multiple Regression Analysis Reveals MicroRNA Regulatory Networks in Oryza sativa under Drought Stress
Source: Int J Genomics. 2018 Oct 4;2018:9395261. doi: 10.1155/2018/9395261 (PMC6196795; doi:10.1155/2018/9395261)
Supplement: Supplementary 1 — Table S1: oligonucleotide primers used in RT-qPCR. [file 9395261.f1.xlsx]

## Sheet: Sheet1
Table S1. Oligonucleotide primers used in RT-qPCR
miRNA/mRNA	Left primer	Right primer
Os06g0154200	GCTAAGTTCGGCATCCATGG	TCACGGATCGGACTTAGAGC
Os02g0709200	TTTGACGGAAGCACTGAAGC	GGCACGGCAGTACAAATTCT
Os04g0517100	AGAGGAGCAGAGCAGTTCAG	TACACGACCTGAACCGAACA
Os09g0323000	TTTCGGTCGTTTGCCTTGAG	TAGACGACCCATGACCCAAC
Os10g0397900	CCTTAGGTCCAGTTCCGGTT	ACAACCCGAACTCTTGACCT
Os09g0279400	ATAAAGCGCACGGTACACAG	CACTGTTCACCAACCTGAGC
Os01g0922600	TCCGGCAATTACTAGCACCA	CTTCCTGCAGCTCCTCTTCT
Os05g0408200	CTGCCTCCATTGGTGCTTTT	GGGGAAAAGCAACAGGAAGG
osa-miR-812q	ACGGACGGTTAAACGTTG
osa-miR-529a	GCAGCTGTACCCTCTCTCT
osa-miR-156b-3p	GCAGTGACAGAAGAGAGTGAG
osa-miR-395a	GGTGAAGTGTTTGGGGGAA
osa-miR-169d	AGCAGCCAAGGATGACT
osa-miR-444b.1	GGCTAGAGGTGGCAAC
osa-miR-396g	CAGTTCCACAGCTTTCTTGA
osa-miR-172d-5p	GCAGAGAATCTTGATGATGCTG
osa-miR-528-3p	GGAAGGGGCATGCAGA
osa-miR-164c	CAGGCTAGAGGTGGCA
osa-miR1430	GTGGTGAGCCTTCCTG
osa-miR159a.2	GCAGTTTGGATTGAAGGGA
osa-miR319a-3p	CTGGATGACGCGGGA
