# Supplementary material for: Multiple Regression Analysis Reveals MicroRNA Regulatory Networks in Oryza sativa under Drought Stress
Source: Int J Genomics. 2018 Oct 4;2018:9395261. doi: 10.1155/2018/9395261 (PMC6196795; doi:10.1155/2018/9395261)
Supplement: Supplementary 2 — Table S2: the specific primer sequences for RLM-5′ RACE of target genes. [file 9395261.f2.xlsx]

## Sheet: Table S1
Table S2 The specific primer sequences for RLM-5’ RACE of target genes
miRNA	Target gene	primer	sequence (5’-3’)
		5’RACE outer primer	GCTGATGGCGATGAATGAACACTG
		5’RACE inner primer	CGCGGATCCGAACACTGCGTTTGCTGGCTTTGATG
osa-miR528-3p	XM_015755214.1	specific outer primer	CTCCCTTGTCCTAGCCTGT
		specific inner primer	GCACAATCCAATACACAACCC
osa-miR812q	XM_015755214.1	specific outer primer	CTCCCTTGTCCTAGCCTGT
		specific inner primer	GCACAATCCAATACACAACCC
osa-miR395a	XM_015788288.1	specific outer primer	ACAGCATATTTTCGAGGACCA
		specific inner primer	ATTCATAAACCCATGCCGAGA
osa-miR396g	XM_015788288.1	specific outer primer	ACAGCATATTTTCGAGGACCA
		specific inner primer	ATTCATAAACCCATGCCGAGA
