# Supplementary material for: Multiple Regression Analysis Reveals MicroRNA Regulatory Networks in Oryza sativa under Drought Stress
Source: Int J Genomics. 2018 Oct 4;2018:9395261. doi: 10.1155/2018/9395261 (PMC6196795; doi:10.1155/2018/9395261)
Supplement: Supplementary 4 — Table S4: enriched KEGG pathways of drought-responsive miRNA targets. [file 9395261.f4.xlsx]

## Sheet: Table S2
Table S4. Enriched KEGG pathways of drought responsive miRNA targets
Category	Term	Count	%	Benjamini	Genes	List Total	Pop Hits	Pop Total	Fold Enrichment
KEGG_PATHWAY	osa04075:Plant hormone signal transduction	52	1.42622	9.23e-06	OS.35013.1.S1_AT, OS.23256.1.S1_AT, OS.53403.1.S1_AT, OS.8618.1.S1_AT, OS.4379.1.S1_AT, OS.12645.1.S1_AT, OS.10356.1.S1_AT, OS.12691.2.S1_A_AT, OS.24952.1.S1_AT, OS.53403.1.S1_S_AT, OS.8423.1.S1_A_AT, OS.5367.1.S1_AT, OS.54299.1.S1_AT, OSAFFX.6408.1.S1_AT, OS.54781.1.S1_AT, OSAFFX.12561.1.S1_S_AT, OS.12012.1.S1_AT, OS.49290.1.S1_AT, OS.3401.1.S1_AT, OS.12691.1.A1_A_AT, OS.9945.1.S1_AT, OS.5690.1.…	616	183	3958	1.82578
KEGG_PATHWAY	osa00520:Amino sugar and nucleotide sugar metabolism	32	0.877674	0.000522	OS.20425.1.S1_AT, OS.6313.1.S1_AT, OS.8158.1.S1_AT, OSAFFX.28327.1.S1_X_AT, OS.48101.1.S1_AT, OS.5016.1.S1_AT, OS.53812.1.S1_AT, OS.26384.1.S1_AT, OS.57033.1.S1_AT, OS.20425.2.S1_AT, OS.5451.1.S1_AT, OS.26909.1.A1_AT, OS.18486.1.S1_AT, OS.12349.1.S1_AT, OS.12780.1.S1_AT, OS.15682.1.A1_AT, OS.23472.2.A1_X_AT, OS.18948.1.S1_AT, OS.51053.1.S1_AT, OS.9285.1.S1_S_AT, OS.11609.1.S1_AT, OS.50492.1.S1_AT…	616	111	3958	1.85235
KEGG_PATHWAY	osa01110:Biosynthesis of secondary metabolites	160	4.38837	0.00232855	OS.52183.1.S1_AT, OS.9878.1.S1_AT, OSAFFX.13059.1.S1_S_AT, OS.11118.1.S1_AT, OS.8779.1.S1_AT, OS.4531.1.S1_AT, OS.33244.1.S1_AT, OS.22726.1.A1_AT, OS.35677.1.S1_AT, OS.10025.1.S1_A_AT, OS.18830.1.S2_AT, OS.16119.1.S1_AT, OS.11547.1.S1_S_AT, OS.20702.1.S1_AT, OS.18649.1.A1_S_AT, OS.13926.1.S1_AT, OS.153.1.S1_AT, OS.15894.1.A2_AT, OS.17997.2.S1_X_AT, OS.34300.1.S1_X_AT, OS.52359.1.S1_AT, OS.1563.1.…	616	847	3958	1.21376
KEGG_PATHWAY	osa00330:Arginine and proline metabolism	14	0.383982	0.00884702	OS.7972.1.S2_AT, OS.52050.1.S1_AT, OS.313.1.S1_A_AT, OS.7972.1.S1_AT, OS.33244.1.S1_AT, OS.18830.1.S2_AT, OS.7932.1.S1_AT, OS.15210.2.S1_X_AT, OS.11412.1.S1_A_AT, OS.4167.1.S1_AT, OS.4600.1.S1_AT, OS.18830.1.S1_AT, OS.55956.1.S1_AT, OS.12281.1.S1_AT, OS.2325.1.S1_AT, OS.25208.1.S1_AT	616	42	3958	2.14177
KEGG_PATHWAY	osa00561:Glycerolipid metabolism	14	0.383982	0.016225	OS.313.1.S1_A_AT, OS.25110.1.S1_A_AT, OS.12534.1.S1_S_AT, OS.17280.1.A1_AT, OS.7932.1.S1_AT, OS.28320.1.S1_AT, OS.53174.1.A1_S_AT, OS.11960.1.S1_AT, OS.18429.1.S1_X_AT, OS.27753.1.S1_AT, OS.11912.1.S1_AT, OS.20982.1.S1_AT, OS.2325.1.S1_AT, OS.11870.1.S1_AT, OSAFFX.26318.1.S1_AT	616	45	3958	1.99899
KEGG_PATHWAY	osa00410:α-linolenic acid metabolism	11	0.3017	0.0192875	OS.11835.3.S1_X_AT, OS.4531.1.S1_AT, OS.313.1.S1_A_AT, OS.12724.1.S1_A_AT, OS.2325.1.S1_AT, OS.15210.2.S1_X_AT, OS.7932.1.S1_AT, OS.2764.1.S1_S_AT, OS.2764.2.S1_X_AT, OS.4862.1.S1_AT, OS.4600.1.S1_AT, OS.8024.1.S1_AT	616	32	3958	2.20871
KEGG_PATHWAY	osa00860:Isoflavonoid biosynthesis	12	0.329128	0.0210878	OS.5439.1.S1_A_AT, OS.10144.1.S1_AT, OS.14194.1.S1_AT, OS.7227.1.S1_AT, OS.14476.1.S1_A_AT, OS.16119.1.S1_AT, OS.10800.1.S1_AT, OS.18818.1.S1_A_AT, OS.50876.1.S1_AT, OS.5164.1.S1_AT, OS.17351.1.A1_AT, OS.32068.1.S1_AT	616	37	3958	2.08389
KEGG_PATHWAY	osa00280:Valine, leucine and isoleucine degradation	12	0.329128	0.0210878	OS.17909.1.S1_A_AT, OS.313.1.S1_A_AT, OS.72.1.S1_X_AT, OS.72.1.S1_AT, OS.19628.1.S1_A_AT, OS.11982.1.S1_AT, OS.28409.20.A1_A_AT, OS.72.1.S1_S_AT, OS.2764.2.S1_X_AT, OS.7932.1.S1_AT, OS.1637.1.S1_AT, OS.47660.1.S1_S_AT, OS.2325.1.S1_AT, OS.2764.1.S1_S_AT, OS.49236.1.S1_AT, OS.32782.1.S1_AT	616	37	3958	2.08389
KEGG_PATHWAY	osa00030:Pentose phosphate pathway	14	0.383982	0.0275423	OS.18381.1.S1_AT, OS.12014.1.S1_S_AT, OS.15065.1.S1_AT, OSAFFX.27312.1.S1_AT, OS.26384.1.S1_AT, OS.34300.3.S1_X_AT, OS.4760.1.S1_AT, OS.17997.2.S1_X_AT, OS.24545.2.S1_X_AT, OS.6393.1.S1_AT, OS.34300.1.S1_X_AT, OS.28418.1.S1_A_AT, OS.10579.1.S1_AT, OS.12230.1.S1_A_AT, OS.609.1.S2_A_AT, OS.7894.1.S1_AT	616	48	3958	1.87405
KEGG_PATHWAY	osa00270:Cysteine and methionine metabolism	21	0.575974	0.033269	OS.7972.1.S2_AT, OS.12201.2.S1_AT, OS.11335.3.S1_X_AT, OS.7972.1.S1_AT, OS.57351.1.S1_AT, OS.52329.1.S1_AT, OS.24993.1.A1_S_AT, OS.12374.2.S1_X_AT, OS.11412.1.S1_A_AT, OS.4167.1.S1_AT, OS.2259.1.S1_AT, OS.17315.1.S1_AT, OS.4600.1.S1_AT, OS.5851.1.S1_AT, OS.23248.1.A1_AT, OSAFFX.25032.1.S1_S_AT, OS.27606.1.S1_AT, OS.11139.1.S1_AT, OS.49205.1.S1_AT, OS.51076.1.S1_AT, OS.4789.1.S1_AT, OS.4666.1.S1_A…	616	85	3958	1.58743
KEGG_PATHWAY	osa00920:Sulfur metabolism	11	0.3017	0.0355991	OS.11335.3.S1_X_AT, OS.52329.1.S1_AT, OS.57351.1.S1_AT, OS.24993.1.A1_S_AT, OSAFFX.28714.1.S1_X_AT, OS.2259.1.S1_AT, OS.17315.1.S1_AT, OS.27580.1.S1_AT, OS.8150.1.S1_AT, OSAFFX.25032.1.S1_S_AT, OS.8150.1.S1_A_AT, OS.4789.1.S1_AT, OSAFFX.7376.1.S1_AT, OS.8150.2.S1_X_AT, OS.8765.1.S1_A_AT	616	35	3958	2.01939
KEGG_PATHWAY	osa00071:Fatty acid degradation	12	0.329128	0.0359842	OS.15058.1.S1_AT, OS.313.1.S1_A_AT, OS.12993.1.S1_AT, OS.1440.2.S1_X_AT, OS.1440.1.S1_AT, OS.7932.1.S1_AT, OS.7310.1.S1_AT, OS.18732.1.S1_AT, OS.1637.1.S1_AT, OS.56290.1.S1_AT, OS.9729.1.S1_A_AT, OS.2325.1.S1_AT, OS.15058.2.S1_AT, OS.27856.1.S1_AT	616	41	3958	1.88058
KEGG_PATHWAY	osa00053:Ascorbate and aldarate metabolism	11	0.3017	0.0406994	OS.20425.1.S1_AT, OS.313.1.S1_A_AT, OS.12693.3.S1_AT, OS.10021.1.S1_AT, OS.5016.1.S1_AT, OS.7932.1.S1_AT, OS.20425.2.S1_AT, OS.6345.1.S1_AT, OS.20425.2.S1_X_AT, OS.2325.1.S1_AT, OS.10473.1.S1_AT, OS.9749.1.S1_AT, OS.12723.1.S1_AT	616	37	3958	1.91023
KEGG_PATHWAY	osa00511:Other glycan degradation	6	0.164564	0.0410123	OS.23472.2.A1_X_AT, OS.9797.1.S1_AT, OS.9285.1.S1_S_AT, OS.23472.1.A1_AT, OS.10371.1.S1_AT, OS.22652.1.S1_AT, OS.26909.1.A1_AT, OSAFFX.16618.1.S1_X_AT	616	14	3958	2.75371
KEGG_PATHWAY	osa00350:Tyrosine metabolism	11	0.3017	0.0446431	OS.11835.3.S1_X_AT, OS.7646.1.S1_A_AT, OS.15058.1.S1_AT, OS.8160.1.S1_AT, OS.49621.1.S1_AT, OS.51076.1.S1_AT, OS.11622.1.S1_AT, OS.15058.2.S1_AT, OS.4799.1.S1_AT, OS.6851.1.S1_AT, OS.4167.1.S1_AT, OS.21340.1.S1_S_AT	616	38	3958	1.85996
KEGG_PATHWAY	osa00630:Glyoxylate and dicarboxylate metabolism	16	0.438837	0.0458996	OS.16736.1.S1_S_AT, OS.25477.1.S1_AT, OS.12728.1.S1_AT, OS.16736.1.S1_AT, OS.39038.1.A1_AT, OS.20702.1.S1_AT, OS.8488.1.S1_S_AT, OS.7879.2.S1_AT, OS.1637.1.S1_AT, OS.10959.1.S2_AT, OS.23248.1.A1_AT, OS.11139.1.S1_AT, OS.49556.1.S1_AT, OS.7295.1.S1_AT, OS.5740.1.S1_AT, OS.7192.1.S1_AT, OS.49336.1.S1_S_AT	616	64	3958	1.60633
KEGG_PATHWAY	osa00460:Cyanoamino acid metabolism	10	0.274273	0.048492	OS.11437.1.S1_AT, OS.9344.1.S1_X_AT, OS.17880.1.S1_A_AT, OS.35044.2.S1_X_AT, OS.25477.1.S1_AT, OS.52541.1.S1_AT, OS.11510.1.S1_AT, OSAFFX.24089.1.S1_X_AT, OS.15799.1.S1_AT, OS.17898.1.S1_AT, OS.11510.1.S1_S_AT	616	36	3958	1.78481
KEGG_PATHWAY	osa00906:Carotenoid biosynthesis	8	0.219419	0.0491067	OS.46548.1.S1_AT, OS.2467.1.S1_AT, OS.50222.1.S1_AT, OSAFFX.24953.1.S1_S_AT, OS.50053.1.A1_AT, OS.10025.1.S1_A_AT, OS.8569.1.S1_AT, OS.46633.1.A1_AT, OS.46548.2.S1_X_AT	616	26	3958	1.97702
