# Supplementary material for: Multiple Regression Analysis Reveals MicroRNA Regulatory Networks in Oryza sativa under Drought Stress
Source: Int J Genomics. 2018 Oct 4;2018:9395261. doi: 10.1155/2018/9395261 (PMC6196795; doi:10.1155/2018/9395261)
Supplement: Supplementary 6 — Figure S2: validation of drought-responsive miRNAs and coregulated target genes by RT-qPCR. The expression level is expressed as the mean fold changes of 3 replicates. Error bars depict the standard error (n = 3). [file 9395261.f6.xlsx]

## Sheet: Sheet1
miRNA/genes	microarray	qRT-PCR
osa-miR1430	-2.32	-1.56
osa-miR156b-3p	-1.62	-1.03
osa-miR159a.2	-1.05	-0.51
osa-miR164c	-2.21	-1.29
osa-miR169d	-1.81	-1.2
osa-miR172d-5p	-1.43	-0.47
osa-miR319a-3p	-1.01	-0.35
osa-miR395a	-0.94	-0.38
osa-miR396g	-1.52	-1.13
osa-miR444b.1	-0.69	-1.36
osa-miR528-3p	1.07	0.49
osa-miR529a	-1.58	-1.01
osa-miR812q	2.01	1.34
DWARF-3	-1.68	-0.87
49D11.4	1.05	0.58
MYB4	0.87	0.45
P0651G05.2	0.36	1.07
NFYA	1.63	1.02
SPL2	1.12	0.57
SPL9	1.57	0.82
